# Supplementary material for: Strigolactones spatially influence lateral root development through the cytokinin signaling network
Source: PubMed Central journal article supplement (PMC4682444; doi:10.1093/jxb/erv478), 2015-10-31
Supplement: supp_erv478_Supplementary_figures_S1_S4.pdf [file supp_erv478_Supplementary_figures_S1_S4.pdf]

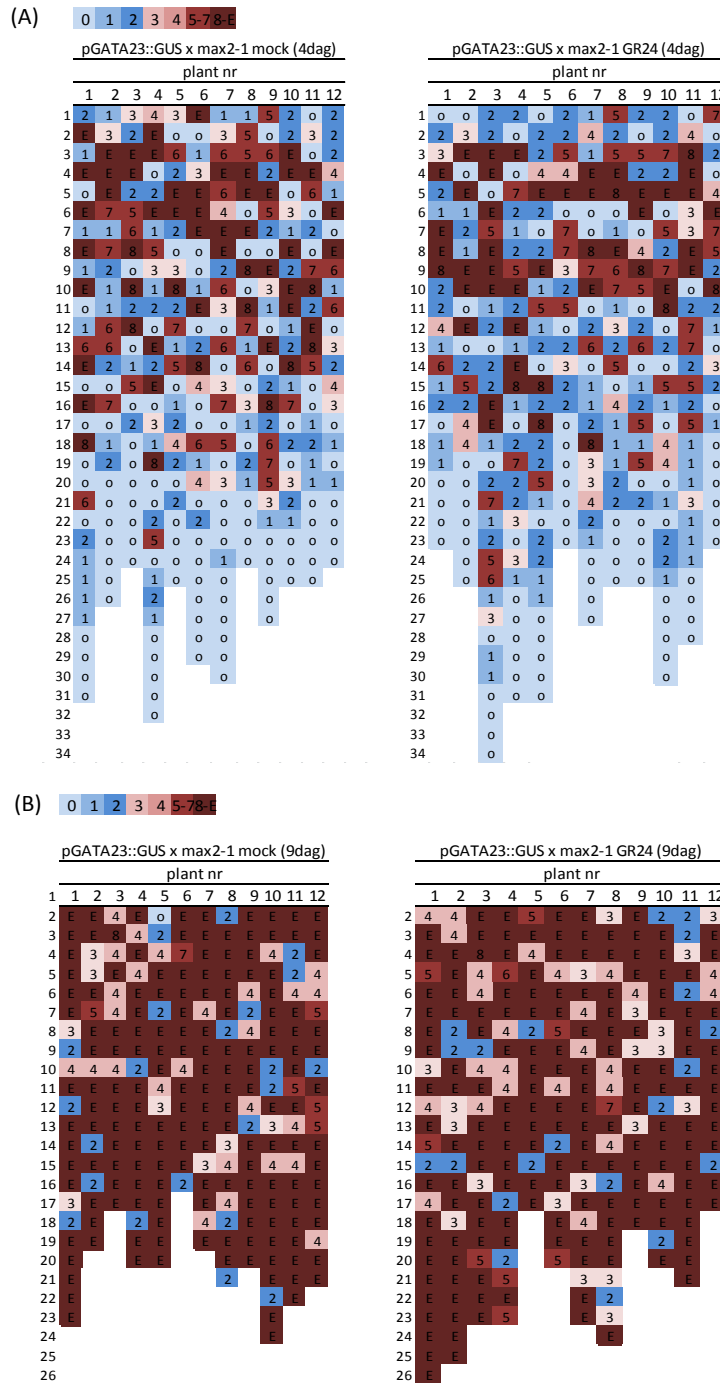

**Supplemental Figure S1. Stages of lateral root primordia via GATA23:GUS staining in *max2-1* under mock and GR24 treatment at 4 and 9 DAG.** Stages of LR primordia via GATA23:GUS staining in *max2-1* under mock (left) and GR24 treatment (right) at 4 DAG (A) and 9 DAG (B). All events, possibly leading to emerged LRs, were scored in individual plants, color-coded, and for each plant, vertically ordered from the closest to the hypocotyl (up) downward to the meristem (down). The root fragments used for analysis were comparable in length.

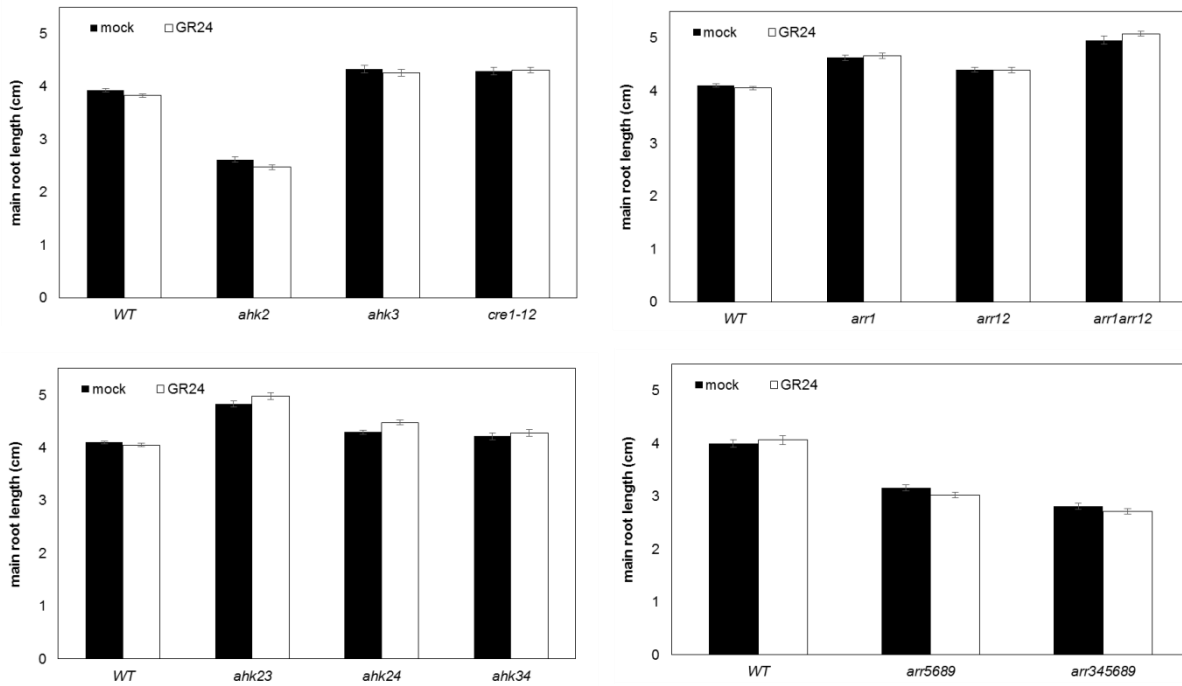

**Supplemental Figure S2. Main root lengths of WT and cytokinin receptor and signal transduction mutants under mock and GR24 treatment.** Main root length of single cytokinin receptor mutants (*ahk2*, *ahk3* and *cre1*), double cytokinin receptor mutants (*ahk2;3*; *ahk2;4* and *ahk3;4*), B-type response regulators (*arr1*, *arr12* and *arr1;12*), and mutants in higher-order A-type response regulators (*arr5;6;8;9* and *arr3;4;5;6;8;9*) upon GR24 treatment. Data presented are means  $\pm$  SE of three biological repeats ( $n > 20$ ).

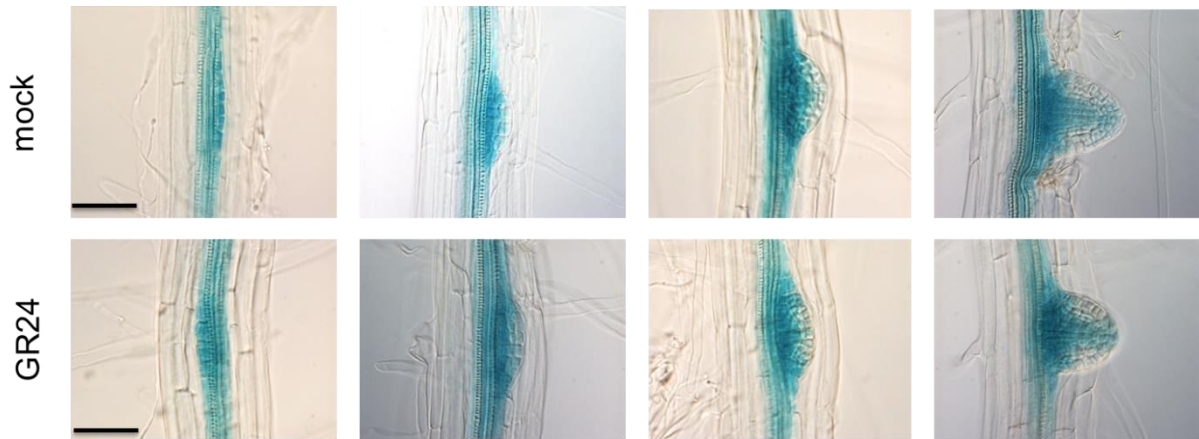

**Supplemental Figure S3. *pAHK3-GUS* expression patterns of lateral root primordia at different developmental stages under mock and GR24 treatment. *pAHK3:GUS* expression patterns of lateral root primordia of plants grown with and without *GR24*, 7 days after growth.**

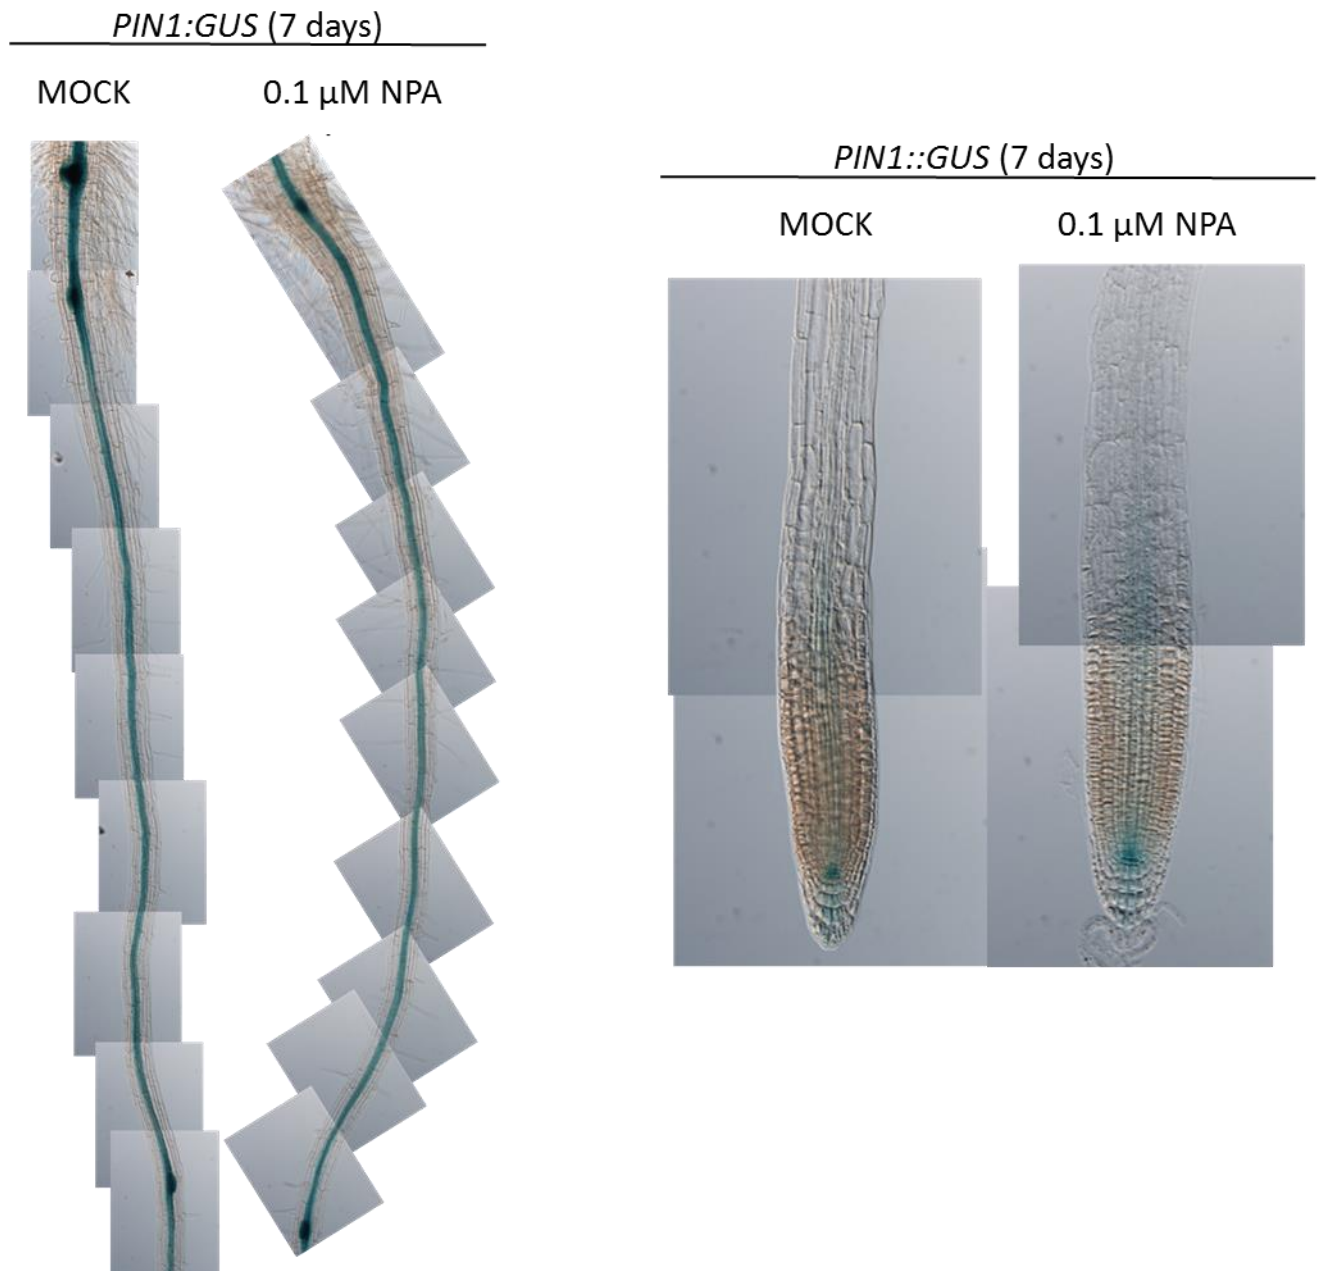

**Supplemental Figure S4. *pPIN1:GUS* expression pattern after treatment with 0.1  $\mu$ M NPA around the root-shoot junction (left) and the root meristem zone (right).** *pPIN1:GUS* expression patterns of plants grown with and without 0.1  $\mu$ M NPA, 7 days after growth. The region around the root-shoot junction until the first emerged lateral root primordium (left) and the root meristem zone (right) are shown.
